# Supplementary material for: 2.5D Facial Personality Prediction Based on Deep Learning
Source: Hindawi journal article supplement (doi:10.1155/2021/5581984), 2021-06-30
Supplement: f1 [file 5581984.f1.docx]

**Supplementary materials**

**Big Five Personality Questionnaire（NEO-FFI）**

Here are 60 statements about personality. Please rate each statement with 1-5 points to what extent it is in line with your own actual situation. Among them, 1 point means very inconsistent, and 5 points means very consistent.

1. I'm not a worried person.
2. I like having a lot of friends around.
3. I like to be immersed in fantasy and daydreaming.
4. I try to be polite to everyone I meet.
5. I keep my things clean and tidy.
6. Sometimes I feel angry and resentful.
7. I laugh easily.
8. I like to cultivate and develop new hobbies.
9. Sometimes, I use threats or flattery to persuade others to do what I want.
10. I am good at arranging the work schedule for myself, so as to finish the task on time.
11. When faced with great pressure, sometimes I feel like I'm going to collapse.
12. I like work that can be done alone and undisturbed.
13. I am fascinated by the beauty of nature and art.
14. Some people think I'm a little egocentric and don't think much about other people's feelings.
15. Many times, when things come to an end, I find I'm not ready.
16. I seldom feel lonely and blue.
17. I like to chat with others very much.
18. I think that exposing students to controversial theories or opinions will only confuse and mislead their thoughts.
19. If someone provokes a dispute, I'm ready to fight back.
20. I will try my best to finish all the tasks assigned to me.
21. I often feel nervous and restless.
22. I like to be in the middle of intense activities.
23. I don't feel much about poetry.
24. I feel better than most people.
25. I have some clear goals and can move towards them in an orderly way.
26. Sometimes I feel totally worthless.
27. I usually avoid crowded occasions.
28. It's hard for me to let my mind imagine freely.
29. After being treated rudely by others, I will try to forgive them and let myself forget it.
30. I waste a lot of time before I start to study or work.
31. I rarely feel fear or anxiety.
32. I often feel energetic.
33. I rarely pay attention to my emotions or feelings in different situations.
34. I believe that human nature is good.
35. I work hard to achieve my goals.
36. The way people treat me often makes me angry.
37. I am an optimistic and cheerful person.
38. I often experience many different feelings or emotions.
39. A lot of people think that I am a little indifferent to people, and often keep a certain distance from others.
40. Once I make a commitment, I usually carry it through.
41. A lot of times, when things don't go well, I feel frustrated and want to give up.
42. I don't like chatting with people very much and seldom get too much fun from it.
43. When I read a poem or appreciate a work of art, I sometimes feel very excited or happy.
44. I am a stubborn person.
45. Sometimes, I'm not so reliable and trustworthy.
46. I seldom feel sad or depressed.
47. I have a fast pace of life.
48. I'm not interested in thinking about the laws of the universe or the state of human existence.
49. I try to be considerate to others.
50. I always do things from beginning to end and am a very capable person.
51. I often feel helpless and hope someone can help me solve the problem.
52. I am a very active person.
53. I'm curious about many things, full of curiosity.
54. If I don't like someone, I'll let him know.
55. I can't seem to keep things in order.
56. Sometimes I feel so ashamed that I just want to hide and not see anyone.
57. I would rather do things by myself than lead others.
58. I like to study theory and abstract problems.
59. If necessary, I will use others to achieve my goal.
60. For everything, I strive to be the best.
